# Supplementary material
Source: publisher figshare collection journal article supplement (https://sage.figshare.com/ndownloader/files/15254519)
Supplement: Supplementary file 1 [file 15254519]

|  |  |  | % of learning (mean ± SD) | % of retention (mean ± SD) | % of generalization (mean ± SD) | |  |
| --- | --- | --- | --- | --- | --- | --- | --- |
|  |  |  |  | |
| Bi-SAT | | real | 65% ± 26% | 56% ± 27% | | 60% ±30% |  | |
| sham | 51% ± 23% | 49% ± 27% | | 63 % ±29% |  | |
| Bi-Co | | real | 14% ± 9% | 14% ±8% | | 15% ±10% |  | |
| sham | 6% ±10% | 9% ± 6% | | 9% ±10% |  | |

**Supplementary Table 2. Percentage of improvement**. The degree of improvement (in percentage ) in Bi-SAT and Bi-Co one hour after learning (after60), the degree of retention and the degree of generalization after one week under real and sham condition are shown.
